# Supplementary material for: Evaluation of Climate Change Impact on Extreme Temperature Variability in the Blue Nile Basin, Ethiopia
Source: Copernicus journal article supplement (doi:10.5194/gi-2020-34), 2020-10-19
Supplement: Supplementary file [file gi-2020-34-RC2-supplement.pdf]

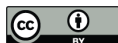

1 **Evaluation of Climate Change Impact on Extreme Temperature Variability in**  
2 **the Blue Nile Basin, Ethiopia**

3 Mostafa A. Mohamed, and Mohamed El-Sayed El-Mahdy

4 **Mostafa A. Mohamed**

5 Assistant Professor of meteorology, Natural Resources Department, Faculty of African Postgraduate  
6 Studies, Cairo University, Giza, Egypt

7 **Mohamed El-Sayed El-Mahdy** (corresponding author)

8 Assistant Professor of Water Resources, Natural Resources Department, Faculty of African Postgraduate  
9 Studies, Cairo University, Giza, Egypt

10 E-mail: m\_elsayed50@cu.edu.eg

11 **Abstract**

12 In this paper, spatial and temporal patterns of changes in extreme temperatures are investigated  
13 using 10 meteorological stations data for the period 1950-2018 in the Blue Nile basin. Monthly  
14 temperature data for the basin were used in the study. Long-term trends in the Blue Nile Basin  
15 annual and monthly temperatures were investigated. The statistical significance of the trend is  
16 calculated by applying the Mann-Kendall (MK) test. The analysis of data was performed using  
17 the coefficient of variance, anomaly index. The results showed that the annual maximum and  
18 minimum temperature is increasing significantly with a magnitude of  $0.037^{\circ}$  and  $0.025^{\circ}$  C per  
19 decade respectively in the period from 1950 to 2018. The result of the Mann-Kendall analysis  
20 test revealed a marked increase in mean maximum and minimum temperatures trend over time  
21 significantly during the study period (the minimum temperature rate is more evident than the  
22 maximum). The long-term anomalies of mean annual minimum temperature revealed the inter-



23 annual variability while the trend after 1977 was higher than the long-term average that is proof  
24 of the warming trend existence since the last two decades of the 20th century.

25 **Keywords:** Trend Analysis, Mann-Kendall Test, Climate Variability, Minimum Temperature,  
26 Maximum Temperature, Blue Nile.

## 27 1. Introduction

28 Climate change is perceived to affect the whole world and there has been a growing concern  
29 about its direction and consequences. The Blue Nile River Basin (BNRB) is the most important  
30 and the potential river basins in the Nile Basin. Many development projects are under  
31 construction currently in the BNRB without detailed climate change thorough analysis. These  
32 projects are essential for irrigation schemes, hydropower generation, and national economic  
33 growth. As a trans-boundary river basin, it attracts the attention of some neighboring countries.  
34 For sound management and planning of water resources, it is important to predict the climate  
35 change and variability of crucial metrological factors as temperature, and precipitation (Tamiru,  
36 2011). Temperature and precipitation are affecting directly the hydrology of the basin (El-Mahdy  
37 et al., 2019). Since temperature affects both evaporation and evapotranspiration, and  
38 precipitation is the source of runoff, so studying these factors is very important in water  
39 resources management of the basin. The detailed analysis of the impact of these factors on basin  
40 hydrology will be addressed by forthcoming researches.

41 The assessment of extreme temperature variability resulted from climate change will help to  
42 better manage the development projects in the BNRB. Global and regional rises in air  
43 temperature, together with its collateral rises in water temperature, drive to negative alterations  
44 in water quality, even with the same precipitation. Lake Tana, located upstream of BNRB, is one  
45 of the greatest natural lakes of Africa (El-Mahdy, 2014). Generally, the Lakes are sensitive to a



46 wide range of climate change consequences. Even a slight change in climate can result in huge  
47 changes in lake salinity and levels (El-Mahdy et al., 2018, Mengistu et al., 2014, Tamiru, 2011).  
48 The symptoms of global warming **could be noticed** almost everywhere around the world.  
49 Heatwaves and droughts are striking a lot of places around the world, so that precipitations,  
50 humidity, and temperatures are rarely normal. These phenomena among others are **considered**  
51 **evidence** of the presence of climate variability. The analysis of data from ground stations and  
52 satellites showed that the mean surface temperature of the world has increased by about 0.6  
53 degrees Celsius over the 20<sup>th</sup> century (Lindzen and Giannitsis, 2002, Tapley et al., 2019). The  
54 warmest years ever have all occurred since 1980 in this century (Janssens et al., 2020). The  
55 warmest recorded year was 1998 (Mann et al., 1999). These alterations appear to be out of the  
56 natural variability range (Houghton, 1996, Mann et al., 1999, Sippel et al., 2020, Watson et al.,  
57 1996). A lot of researches studied the impact of temperature rise on runoff, **it** was found, with  
58 high confidence, that the runoff has increased in winter and decreased in summer and spring, **in**  
59 **addition to higher peak flows** have occurred in these basins (Anache et al., 2018, Bergström et  
60 al., 2001, Chen et al., 2012, Yan et al., 2020).  
61 The results of the simulation studies conducted by **(Gleick, 2000)** in the USA concluded that  
62 small alterations in rainfall and temperature may lead to huge impacts on runoff. It was found  
63 that if temperature increases without a change in rainfall, the runoff will decrease. A 10%  
64 decrease in rainfall together with a temperature rise of 2°C will reduce the runoff by 13-40%. On  
65 the other hand, if rainfall increases by 10% and the temperature rise by 4°C, ~~almost~~ the rainfall  
66 increase will **balance** evaporation losses and no alteration on runoff is predicted. Although these  
67 findings are not comprehensive, **but** they reveal the possible size and uncertainty encircling the  
68 hydrologic and climatic implications of greenhouse warming (El-Mahdy, 2011).



69 Temperature is the most serious climate variable that affects hydrology and climate which,  
70 consequently, has an enormous direct and indirect impact on human life and the environment.

71 The temperature is a continuous variable in both space and time. The Monthly Mean  
72 Temperature (MMT), as well as the maximum and minimum MMT, always matches a normal  
73 distribution (Jones and Hulme, 1996). The predicted climate change may affect most of the  
74 Ethiopian districts. Drought remains Ethiopia's major hazard, while floods following in another  
75 place (Conway and Schipper, 2011). Recently, it is clear that both drought and flood have  
76 increased in both frequency and size (Margaret, 2003).

77 A recent study by (Gebrehiwot and van der Veen, 2013) indicated that climate change in  
78 Ethiopia could lead to extreme temperatures and rainfall events, leading to more heavy and  
79 extended droughts and floods. The climate of Ethiopia is composed of three distinct seasons  
80 named: Belg, Kiremt, and Bega seasons (Haile, 2005). Belg is a short rain season which covers  
81 the period from February to May. The rainfall in the Belg season results by the humid south-  
82 eastern and eastern winds that originate from the Indian Ocean. Kiremt is a long rainy season  
83 that starts in June and normally ends in September. The Kiremt season's rainfall results  
84 substantially from the convergence of low-pressure winds and the Intertropical Convergence  
85 Zone (ITCZ). Finally, the dry season, called Bega, extends from October to January (Tabari et  
86 al., 2015). Changes in sea surface temperature and El Niño Southern Oscillation (ENSO) periods  
87 in the Indian and Atlantic Oceans have effects on the timing and amount of rainfall in Ethiopia  
88 (Fekadu, 2015, Shanko and Camberlin, 1998). Asfaw et al. (2018) found that the drought events  
89 of Ethiopia are the result of both ENSO, Sea Surface Temperature (SST) variations in the Indian  
90 and Atlantic, and anthropogenic activities. Kiros et al. (2016) found that the result of different  
91 studies of temperature trend analyses in Northern Ethiopia is a mixture of non-significant



92 negative and positive trends. (Mengistu et al., 2014) noted that the trend of temperature **was**  
93 **increasing and statistically significant in Ethiopia**. Although the concept of global warming and  
94 its impact on BNRB **was** studied before, **but** the analysis of long enough time series over  
95 multiple weather stations with the appropriate statistical tools was not found. The main objective  
96 of this research is to detect any climate change through the evaluation of extreme temperature  
97 variability using trend analysis of along temperature time series in the BNRB, Ethiopia.

## 98 **2. Data and Methodology**

### 99 **2.1.Types of data**

100 Temperature data, which is used in the variability and time series trend analysis, has been  
101 obtained from Ethiopia Meteorological Authority. Ten stations covering different parts of BNRB  
102 have been chosen to study the variability of their data sets (see Table 1 and Figure 1). The  
103 climate data consist of maximum & minimum MMT data **probably** with long years of records for  
104 10 stations that have been collected in the BNRB. The length of record of the data made  
105 available for this analysis varies from 62 to 68 years, **most** analyses have focused on changes in  
106 mean values due to the lack of the availability of high-quality daily data required for monitoring,  
107 detecting, and attributing climate extremes changes (Jones, 1999). The study period (1950-2018)  
108 was chosen according to the availability of the recorded data for all stations. The missing data  
109 were calculated using the average of previous and subsequent months (for missed monthly data),  
110 but the analysis excluded annual missing data.

111

112

113

114

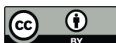

115 Table (1): Selected weather stations of the Blue Nile basin and their general information.

| No | Station Name | Longitude (E) | Latitude (N) | Altitude (m) | Area (%) | Mean annual rainfall (mm) |
|----|--------------|---------------|--------------|--------------|----------|---------------------------|
| 1  | Addis Ababa  | 38.7          | 9.03         | 2408         | 16.45    | 1165                      |
| 2  | Assosa       | 34.52         | 10.07        | 1560         | 7.89     | 1126                      |
| 3  | Bahir Dar    | 37.42         | 11.06        | 1770         | -        | -                         |
| 4  | Debre Markos | 37.67         | 10.33        | 2515         | 11.84    | 1303                      |
| 5  | Gondar       | 37.04         | 12.05        | 2000         | 13.82    | 1102                      |
| 6  | Gore         | 35.53         | 8.15         | 2002         | 8.55     | 2181                      |
| 7  | Dangla       | 36.8          | 11.3         | 2030         | 4.61     | 1491                      |
| 8  | Jimma        | 36.83         | 7.67         | 1676         | 12.5     | 1480                      |
| 9  | Sibu Sere    | 36.9          | 9.00         | 1750         | 8.55     | 1420                      |
| 10 | Dessie       | 39.67         | 11.08        | 2460         | 15.79    | 1045                      |

116 (Source: Ethiopia Meteorological Authority)

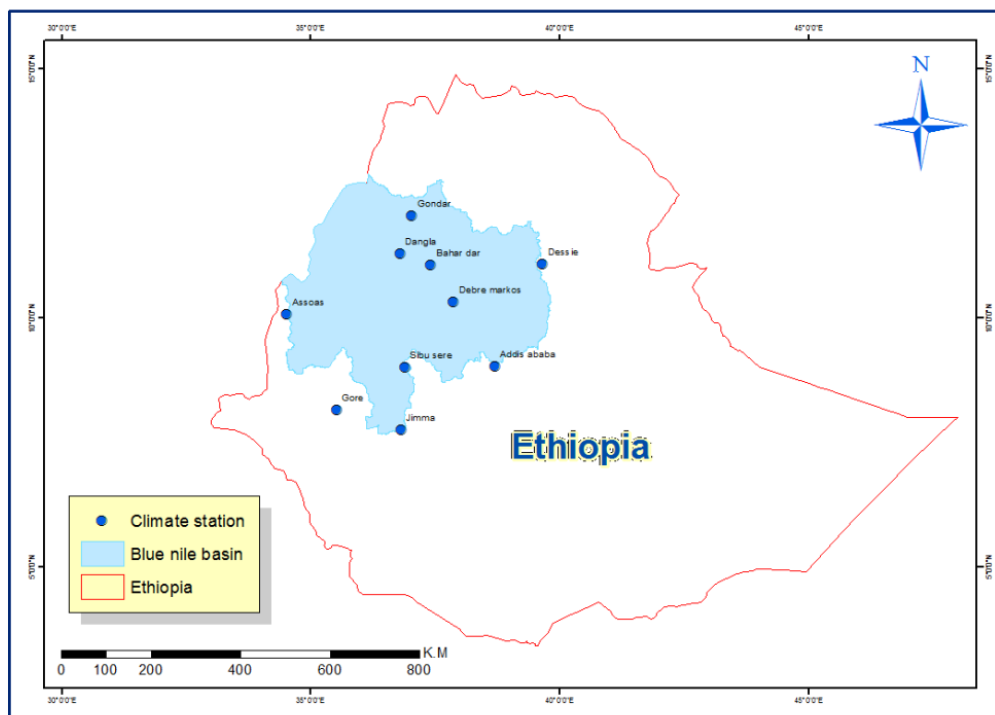

117  
 118 Figure (1): Location map of the Blue Nile Basin and the selected meteorology

119

120

121



## 122 2.2. Description of the study area

123 The BNRB starts at the outlet of Lake Tana in Ethiopia and flows downstream to Khartoum in  
124 Sudan where it meets the White Nile. The basin surface area is 324,530 km<sup>2</sup>. The terrain of the  
125 BNRB is generally hilly which contains valleys, highlands, and a lot of rock peaks. The Lake  
126 Tana Basin is located in north-western Ethiopia of Latitude 10.95° and 12.7° N, and longitude  
127 36.89° and 38.2° E with a drainage area of about 15,000 km<sup>2</sup> (Sintayehu, 2015). Lake Tana,  
128 upstream of BNRB, is the greatest natural lake in Ethiopia and the third greatest natural lake in  
129 the Nile Basin, is located in this basin. The main rivers that feed Lake Tana are Gilgil Abai,  
130 Gomera, Rip, and Magek (El-Mahdy, 2017). These short length rivers constitute about 93% of  
131 the outflow of the lake (Kebede et al., 2006). The highest temperature recorded in the BNRB is  
132 located in the northwestern part. In some parts of Dabus, Dinder, Rihad, and Beles, the  
133 maximum recorded temperature reaches 38°C and minimum approaches 15°C. on the other hand,  
134 the lower temperature is recorded in the eastern and central parts of the basin in the Ethiopian  
135 highlands. In these areas, the maximum temperature is 20°C and the minimum is -1°C (Tamiru,  
136 2011).

## 137 2.3. Methods

138 The analysis of temperature was performed using many techniques. These techniques are  
139 generally categorized as trend analysis and variability as standard deviation (SD). The variability  
140 analysis encompasses the Coefficient of Variation (CV), moving average, and the percentage  
141 departure from the mean (Gebrechorkos et al., 2020). On the other hand, trend analysis is applied  
142 to consistent data only utilizing parametric and non-parametric tests. The homogeneity and  
143 normality of the variance over the data series are usually affected by missing data and outliers in  
144 parametric tests. The non-parametric test is used to overcome the problem of non-normally



145 distributed, missing data, and outliers. This problem is repeatedly found in the hydrological and  
146 meteorological time series. For these reasons, Mann- Kendall (MK) test is commonly utilized to  
147 discover the trends of meteorological and hydrological variables (Degefu and Bewket, 2014,  
148 Kiros et al., 2016, Seleshi and Camberlin, 2006, Tabari and Tavakoli, 2016). MK is a  
149 nonparametric test, that assesses the trend of any time series without assigning if the trend is  
150 non-linear or linear. MK test is commonly used to discover the monotonic (increasing or  
151 decreasing) trends in the time series of hydrological, meteorological, and environmental data  
152 (Yue et al., 2002). In the current paper, the variability of temperature was calculated employing  
153 the SD and CV tests. Moreover, MK was employed to reveal the temperature trend using Sen's  
154 slope estimator. SPSS v22 software was used to perform the data analysis. CV is computed to  
155 evaluate the rainfall variability. the higher the CV value, the larger variability of rainfall. CV is  
156 calculated using the following equation:

$$157 \quad CV = \frac{\sigma}{\mu} \times 100 \quad (1)$$

158 Where CV is the coefficient of variation;  $\sigma$  is the standard deviation and  $\mu$  is the mean (Isioma et  
159 al., 2018). MK test was employed to explore the presence of monotonic trends in the time series,  
160 and the statistical significance of the trend. Since outliers cannot be averted in any time-series,  
161 the MK test is advantageous because it is based on the (+ or -) signs instead of the random  
162 variable values. Therefore, the MK test is less influenced by the outliers (Asfaw et al., 2018).  
163 The test of homogeneity was conducted employing Pettitt's test (Pettitt, 1979). In this test, every  
164 value in the time series is compared with all posterior values in the data series. If the value of the  
165 subsequent period is greater than the value of the preceding period, the statistic (S) is raised by  
166 one and vice versa. The summation of all increments and decrements reveals the total value of





167 the statistic (S). The MK test statistic ‘S’ is calculated based on (Mann, 1945, McLeod, 2005,  
168 Yue et al., 2002), using the formula:

$$169 \quad S = \sum_{i=1}^{n-1} \sum_{j=i+1}^n \text{sgn}(x_j - x_i) \quad (2)$$

170 The trend test is applied on a time series  $x_i$  which is ranked as  $i = 1, 2, \dots, n-1$  and  $x_j$ , that is  
171 ranked as  $j = i + 1, 2, \dots, n$ . Each of the data point  $x_i$  is taken as a reference point to be compared  
172 with the other data point's  $x_j$  so that:

$$173 \quad \text{Sgn}(x_j - x_i) = \begin{cases} +1 & \text{if } (x_j - x_i) > 0 \\ 0 & \text{if } (x_j - x_i) = 0 \\ -1 & \text{if } (x_j - x_i) < 0 \end{cases} \quad (3)$$

174 where  $x_i$  and  $x_j$  are the data values in the years  $i$  and  $j$  respectively ( $j > i$ ).

175 It was reported that, if the number of observations is greater than 10 ( $n \geq 10$ ), the statistic (S) is  
176 usually normally distributed around the mean (McLeod, 2005). So that, the variance could be  
177 formulated as:

$$178 \quad \text{Var}(S) = \frac{n(n-1)(2n+5) - \sum_{i=1}^m t_i(t_i-1)(2t_i+5)}{18} \quad (4)$$

179 where  $n$  is the number of observation and  $t_i$  are the ties of the sample time series. The test  
180 statistics  $Z_c$  is as follows:

$$181 \quad Z = \begin{cases} \frac{S-1}{\sigma} & \text{if } S > 0 \\ 0 & \text{if } S = 0 \\ \frac{S+1}{\sigma} & \text{if } S < 0 \end{cases} \quad (5)$$

182 If  $Z_c$  follows a normal distribution, its positive or negative value refers to an upward or  
183 downward trend for the studied period respectively. The trend magnitude could be calculated by  
184 slope estimator methods (Sen, 1968). Here, the slope ( $T_i$ ) of all data pairs is calculated according  
185 to (Sen, 1968). In general,  $T_i$  for any time series  $x$  could be predicted from:



186 
$$T_i = \frac{x_j - x_k}{j - k} \quad (6)$$

187 where  $x_j$  and  $x_k$  are considered as data values at time  $j$  and  $k$  ( $j > i$ ) correspondingly. The median  
188 of these  $N$  values of  $T_i$  is represented as Sen's estimator of the slope which is calculated as  
189  $Q_{med} = T_{(N+1)/2}$  if  $N$  is an odd number, and it is computed as  $Q_{med} = [T_{N/2} + T_{(N+2)/2}] / 2$  if  $N$   
190 is an even number. A positive value of  $T_i$  indicates an upward or increasing trend and a negative  
191 value of  $T_i$  gives a downward or decreasing trend in the time series.

### 192 3. Results and Discussion

193 The MK test and Sen's slope estimator were applied to the time-series 1950–2018 for the ten  
194 meteorological stations in BNRB. The annual and seasonal mean of the climatic parameters,  
195 particularly minimum and maximum MMT were analyzed. Table 2 shows the MK test statistics  
196 and  $p$  values at 5%, 1%, and 0.1% level of significances. In the MK test, parameters such as  
197 Kendall's tau,  $S$ , and  $Z$  statistics were computed to determine the positive or negative trend of  
198 climate parameters in the long time series studied.

199 Surface air temperature rises globally, although global warming is not uniform over the world,  
200 neither temporally nor spatially (Turner et al., 2020). The surface temperature increase is the  
201 direct demonstration of global climate change (Brunet et al., 2005). Tables 2 and 4 showed the  
202 annual and monthly MMT maximum and minimum and their trend during the study period. The  
203 mean minimum temperature in the BNRB area was  $6.7^\circ\text{C}$  and the mean maximum was  $25.5^\circ\text{C}$ ,  
204 with a mean annual temperature of  $16.1^\circ\text{C}$ . The regression line slope is about  $0.036^\circ$  and  
205  $0.024^\circ\text{C}$  per decade for minimum and maximum annual temperatures respectively for the studied  
206 period of 1950–2018 as shown in Tables 3 and 5 in addition to Figures 2 and 3. These results are  
207 close to the previously found global warming rate which is  $0.06^\circ\text{C}$  per decade for the last  
208 century (Pachauri and Meyer, 2014). Figures 4 and 5 showed the long-range anomalies of mean



209 annual minimum and maximum temperatures. It is clear that the trend after 1985 was greater  
210 than the long-term average. This is considered as strong evidence for the global warming trend  
211 since the 20<sup>th</sup> century last two decades. This result enhances the previously found results that the  
212 climate becomes warmer since the end of the last century (Bathiany et al., 2018, Guo et al., 2020,  
213 Nijssse et al., 2019).

214 As shown in Tables 2 and 4, the result of the MK test detected that the mean maximum and  
215 minimum temperatures increased significantly overtime at a 99% confidence level. The trend for  
216 monthly minimum and maximum temperature is increasing significantly for all months. The  
217 gross increase in the observed annual temperature is attributed to the increase in the minimum  
218 temperature. Many researchers have reported that the minimum temperature rises more than the  
219 maximum (Bayramzadeh et al., 2018, Crimp et al., 2018, Gross et al., 2018, Scott et al., 2017)

220 The minimum temperature incremental increase is more evident than that of the maximum. The  
221 results are of good agreement with the results by (Asfaw et al., 2018). The results of the MK  
222 analysis revealed an increase in both mean and minimum temperatures throughout the studied  
223 period significantly. On the other hand, the maximum temperature has a non-significant  
224 increasing trend. The studies that agree with these results such as (Mengistu et al., 2014, Roy and  
225 Das, 2013) found that the increasing trends in the maximum temperature series were less than the  
226 minimum temperature series. The cause that the minimum temperature increases more than the  
227 maximum may be explained as the sensitivity of minimum temperature to the greenhouse is  
228 higher than the maximum (Salawitch, 1998). Table 6 showed that the minimum temperature has  
229 an increasing trend in Bega, Belg, and Kiremt seasons in the stations of Bahir Dar, Debre  
230 Markos, Gondar, Gore, and Jimma with a level of significance 5%, 1%, and 0.1%. Also, the  
231 maximum temperature in the three seasons has a significant increasing trend in Addis Ababa,

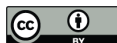

232 Bahir Dar, Gondar, and Gore stations and the trend is statistically significant at 0.1%, 1%, and  
 233 5% level of significance as shown in Table 7.

234 Table (2): Basic statistics and MK trend analysis of minimum temperature in the Blue Nile basin  
 235 (1950–2018).

| Month         | Min. | Max. | Mean | SD  | CV(%) | Skewness/<br>Kurtosis | MK<br>Test | Sens<br>slope |
|---------------|------|------|------|-----|-------|-----------------------|------------|---------------|
| January       | 6.7  | 11.8 | 10.0 | 1.2 | 11.8  | -0.9/0.7              | 5.26***    | 0.031         |
| February      | 8.6  | 13.5 | 11.3 | 1.1 | 10.0  | -0.5/-0.1             | 5.62***    | 0.035         |
| March         | 10.0 | 14.6 | 12.8 | 1.1 | 8.8   | -0.8/-0.4             | 5.70***    | 0.037         |
| April         | 11.2 | 15.5 | 13.6 | 1.0 | 7.4   | -0.5/-0.7             | 5.54***    | 0.036         |
| May           | 11.6 | 15.4 | 13.8 | 1.0 | 7.2   | -0.5/-0.8             | 5.63***    | 0.035         |
| June          | 10.7 | 15.0 | 13.6 | 1.1 | 7.8   | -0.9/-0.3             | 5.75***    | 0.038         |
| July          | 10.7 | 14.9 | 13.5 | 0.9 | 6.9   | -0.8/-0.1             | 6.76***    | 0.037         |
| August        | 10.5 | 14.7 | 13.3 | 0.9 | 6.8   | -0.8/0.0              | 7.45***    | 0.039         |
| September     | 10.0 | 14.3 | 12.9 | 0.9 | 7.0   | -0.8/0.1              | 6.83***    | 0.035         |
| October       | 8.8  | 13.1 | 11.5 | 1.0 | 9.1   | -0.7/-0.5             | 6.73***    | 0.040         |
| November      | 8.0  | 12.3 | 10.2 | 1.0 | 9.5   | -0.5/-0.5             | 5.24***    | 0.031         |
| December      | 7.1  | 11.9 | 9.5  | 1.1 | 11.7  | -0.1/-0.8             | 5.47***    | 0.036         |
| Annual        | 10.3 | 13.4 | 12.2 | 0.9 | 7.5   | -0.7/-0.9             | 6.53***    | 0.036         |
| Bega (ONDJ)   | 8.2  | 11.8 | 10.3 | 0.9 | 8.9   | -0.6/-0.8             | 6.85***    | 0.035         |
| Belg (FMAM)   | 10.6 | 14.5 | 12.9 | 1.0 | 7.9   | -0.6/-0.7             | 5.70***    | 0.036         |
| Kiremt (JJAS) | 10.4 | 14.6 | 13.3 | 0.9 | 7.0   | -0.9/0.0              | 6.96***    | 0.037         |

236

237 Table (3): Linear regression result (Annual minimum temperature, Bega, Belg and Kiremt  
 238 season) (1950–2018)

| Season        | Change in minimum<br>(°C/year) | P-value | R <sup>2</sup> | CV (%) |
|---------------|--------------------------------|---------|----------------|--------|
| Annual        | 0.037                          | 0.001   | 0.65           | 7.5    |
| Bega (ONDJ)   | 0.037                          | 0.001   | 0.64           | 8.9    |
| Belg (FMAM)   | 0.038                          | 0.001   | 0.55           | 7.9    |
| Kiremt (JJAS) | 0.037                          | 0.001   | 0.63           | 7.0    |

239

240

241

242

243



244 Table (4): Basic statistics and MK trend analysis of maximum temperature in the Blue Nile basin  
 245 (1950–2018).

| Month         | Min. | Max. | Mean | SD  | CV(%) | Skewness/<br>Kurtosis | MK<br>Test | Sens<br>slope |
|---------------|------|------|------|-----|-------|-----------------------|------------|---------------|
| January       | 24.5 | 27.9 | 26.5 | 0.8 | 2.9   | -0.6/-0.3             | 4.88***    | 0.023         |
| February      | 24.2 | 30.0 | 27.6 | 1.1 | 3.8   | -0.5/1.1              | 4.93***    | 0.027         |
| March         | 25.5 | 30.9 | 28.4 | 1.0 | 3.6   | -0.6/0.9              | 5.39***    | 0.027         |
| April         | 25.5 | 30.3 | 28.0 | 1.1 | 4.0   | -0.4/-0.6             | 5.51***    | 0.036         |
| May           | 25.2 | 29.0 | 27.1 | 0.9 | 3.2   | -0.3/-0.6             | 4.59***    | 0.024         |
| June          | 23.3 | 26.6 | 25.1 | 0.7 | 2.9   | -0.5/-0.3             | 5.13***    | 0.022         |
| July          | 20.8 | 25.0 | 23.2 | 0.8 | 3.5   | -0.5/0.4              | 5.94***    | 0.024         |
| August        | 21.3 | 24.2 | 23.1 | 0.7 | 3.0   | -0.6/-0.4             | 6.14***    | 0.024         |
| September     | 22.6 | 25.4 | 24.2 | 0.6 | 2.5   | -0.4/-0.1             | 6.06***    | 0.019         |
| October       | 23.3 | 26.2 | 25.1 | 0.6 | 2.6   | -0.5/0.0              | 4.78***    | 0.018         |
| November      | 23.5 | 26.8 | 25.6 | 0.8 | 3.1   | -0.7/-0.3             | 5.26***    | 0.022         |
| December      | 23.2 | 26.9 | 25.9 | 0.8 | 3.1   | -1.1/0.9              | 5.82***    | 0.025         |
| Annual        | 24.5 | 26.8 | 25.8 | 0.6 | 2.5   | -0.5/-1.0             | 7.09***    | 0.024         |
| Bega (ONDJ)   | 24.1 | 26.8 | 25.8 | 0.7 | 2.6   | -0.7/-0.5             | 6.05***    | 0.023         |
| Belg (FMAM)   | 25.6 | 29.2 | 27.8 | 0.9 | 3.1   | -0.5/-0.2             | 6.16***    | 0.028         |
| Kiremt (JJAS) | 22.4 | 25.0 | 23.9 | 0.6 | 2.6   | -0.8/-0.1             | 6.59***    | 0.021         |

246  
 247 Table (5): Linear regression result (Annual maximum temperature, Bega, Belg and Kiremt  
 248 season) (1950–2018)

| Season        | Change in maximum<br>(°C/year) | P-value | R <sup>2</sup> | CV (%) |
|---------------|--------------------------------|---------|----------------|--------|
| Annual        | 0.025                          | 0.001   | 0.644          | 2.5    |
| Bega (ONDJ)   | 0.023                          | 0.001   | 0.493          | 2.6    |
| Belg (FMAM)   | 0.030                          | 0.001   | 0.482          | 3.1    |
| Kiremt (JJAS) | 0.023                          | 0.001   | 0.534          | 2.6    |

249



250 Table (6): Mann-Kendal minimum temperature trend analysis (Based on gauge stations)

|                          | Season |             | Addis Ababa | Assosa | Bahir Dar | Debre Markos | Gondar | Gore   | Dangla | Jimma  | Sibu Sere | Dessie |     |
|--------------------------|--------|-------------|-------------|--------|-----------|--------------|--------|--------|--------|--------|-----------|--------|-----|
| Minimum temperature (°C) | Annual | Mean        | 9.5         | 15.1   | 11.9      | 9.6          | 13.0   | 13.5   | 18.3   | 11.6   | 11.0      | 11.9   |     |
|                          |        | SD          | 0.9         | 0.7    | 1.4       | 0.9          | 0.7    | 0.5    | 0.8    | 1.0    | 0.5       | 1.3    |     |
|                          |        | CV          | 0.1         | 0.0    | 0.1       | 0.1          | 0.1    | 0.0    | 0.0    | 0.0    | 0.1       | 0.0    | 0.1 |
|                          |        | MK          | 1.22        | 0.3    | 5.1***    | 7.0***       | 4.5*** | 4.4*** | -2.6*  | 4.5*** | 2.7**     | 1.2    |     |
|                          |        | Sen's slope | 0.005       | 0.0    | 0.0       | 0.0          | 0.0    | 0.0    | 0.0    | 0.0    | 0.0       | 0.0    |     |
|                          | Bega   | Mean        | 7.6         | 14.2   | 9.8       | 8.2          | 11.6   | 13.5   | 15.5   | 8.3    | 8.4       | 9.4    |     |
|                          |        | SD          | 1.2         | 0.9    | 1.6       | 1.0          | 0.9    | 0.5    | 1.3    | 1.6    | 1.0       | 1.1    |     |
|                          |        | CV          | 0.2         | 0.1    | 0.2       | 0.1          | 0.1    | 0.0    | 0.1    | 0.2    | 0.1       | 0.1    |     |
|                          |        | MK          | 0.33        | -0.3   | 4.9***    | 6.7***       | 4.8*** | 4.1*** | -1.8   | 4.6*** | 0.9       | 1.0    |     |
|                          |        | Sen's slope | 0.002       | 0.0    | 0.1       | 0.0          | 0.0    | 0.0    | 0.0    | 0.0    | 0.0       | 0.0    |     |
|                          | Belg   | Mean        | 10.5        | 16.1   | 12.4      | 10.5         | 14.3   | 14.2   | 18.8   | 11.7   | 11.5      | 12.5   |     |
|                          |        | SD          | 0.9         | 1.2    | 1.7       | 1.1          | 0.9    | 0.7    | 1.0    | 1.5    | 0.8       | 1.5    |     |
|                          |        | CV          | 0.1         | 0.1    | 0.1       | 0.1          | 0.1    | 0.0    | 0.1    | 0.1    | 0.1       | 0.1    |     |
|                          |        | MK          | 0.99        | 0.6    | 5.0***    | 5.9***       | 3.7*** | 2.7**  | -2.7** | 3.2**  | 3.1**     | 1.2    |     |
|                          |        | Sen's slope | 0.006       | 0.0    | 0.1       | 0.0          | 0.0    | 0.0    | 0.0    | 0.0    | 0.0       | 0.0    |     |
|                          | Kiremt | Mean        | 10.6        | 15.1   | 13.7      | 10.0         | 13.2   | 12.8   | 20.5   | 14.6   | 13.1      | 13.9   |     |
|                          |        | SD          | 0.7         | 0.8    | 1.2       | 0.9          | 0.7    | 0.4    | 0.6    | 1.2    | 0.4       | 1.8    |     |
|                          |        | CV          | 0.1         | 0.1    | 0.1       | 0.1          | 0.1    | 0.0    | 0.0    | 0.1    | 0.0       | 0.1    |     |
|                          |        | MK          | 2.17*       | 1.4    | 4.7***    | 6.9***       | 3.4*** | 5.6*** | -2.0*  | 2.7**  | 2.2*      | 1.5    |     |
|                          |        | Sen's slope | 0.01        | 0.0    | 0.0       | 0.0          | 0.0    | 0.0    | 0.0    | 0.0    | 0.0       | 0.0    |     |

251



252 Table (7): Mann-Kendal maximum temperature trend analysis (Based on gauge stations)

|                          |        | Season      | Addis Ababa | Assosa | Bahir Dar | Debre Markos | Gondar | Gore   | Dangla | Jimma | Sibu Sere | Dessie |     |
|--------------------------|--------|-------------|-------------|--------|-----------|--------------|--------|--------|--------|-------|-----------|--------|-----|
| Maximum temperature (°C) | Annual | Mean        | 22.8        | 28.2   | 26.8      | 22.4         | 26.6   | 23.5   | 29.8   | 27.3  | 26.9      | 26.2   |     |
|                          |        | SD          | 0.8         | 0.6    | 0.6       | 0.4          | 0.5    | 0.5    | 1.8    | 0.5   | 0.5       | 0.7    |     |
|                          |        | CV          | 0.0         | 0.0    | 0.0       | 0.0          | 0.0    | 0.0    | 0.0    | 0.1   | 0.0       | 0.0    | 0.0 |
|                          |        | MK          | 5.25***     | 1.6    | 4.3***    | 3.4***       | 4.0*** | 4.8*** | 1.5    | 1.5   | -0.2      | 2.5*   |     |
|                          |        | Sen's slope | 0.026       | 0.0    | 0.0       | 0.0          | 0.0    | 0.0    | 0.0    | 0.0   | 0.0       | 0.0    |     |
|                          | Bega   | Mean        | 22.7        | 28.6   | 26.4      | 22.7         | 26.9   | 23.9   | 29.7   | 27.2  | 27.5      | 24.4   |     |
|                          |        | SD          | 1.0         | 0.7    | 0.7       | 0.7          | 0.6    | 0.6    | 1.8    | 0.4   | 0.6       | 0.8    |     |
|                          |        | CV          | 0.0         | 0.0    | 0.0       | 0.0          | 0.0    | 0.0    | 0.1    | 0.0   | 0.0       | 0.0    |     |
|                          |        | MK          | 5.08***     | 2.1*   | 4.4***    | 3.1**        | 3.5*** | 3.9*** | 1.1    | -0.4  | 0.6       | 4.2*** |     |
|                          |        | Sen's slope | 0.027       | 0.0    | 0.0       | 0.0          | 0.0    | 0.0    | 0.0    | 0.0   | 0.0       | 0.0    |     |
|                          | Belg   | Mean        | 24.4        | 31.2   | 29.1      | 24.7         | 29.0   | 25.4   | 33.5   | 28.4  | 28.4      | 26.7   |     |
|                          |        | SD          | 1.2         | 0.8    | 0.9       | 0.7          | 0.9    | 0.7    | 2.1    | 0.8   | 0.7       | 1.0    |     |
|                          |        | CV          | 0.0         | 0.0    | 0.0       | 0.0          | 0.0    | 0.0    | 0.1    | 0.0   | 0.0       | 0.0    |     |
|                          |        | MK          | 3.44***     | 1.8    | 2.5*      | 2.3*         | 2.4*   | 2.7**  | 2.4*   | 1.5   | -0.6      | 0.2    |     |
|                          |        | Sen's slope | 0.026       | 0.0    | 0.0       | 0.0          | 0.0    | 0.0    | 0.0    | 0.0   | 0.0       | 0.0    |     |
|                          | Kiremt | Mean        | 21.3        | 25.0   | 24.9      | 19.7         | 23.9   | 21.3   | 26.2   | 26.5  | 24.8      | 27.6   |     |
|                          |        | SD          | 0.8         | 0.7    | 0.6       | 0.4          | 0.6    | 0.5    | 2.0    | 0.6   | 0.6       | 0.7    |     |
|                          |        | CV          | 0.0         | 0.0    | 0.0       | 0.0          | 0.0    | 0.0    | 0.1    | 0.0   | 0.0       | 0.0    |     |
|                          |        | MK          | 4.41***     | 0.2    | 3.9***    | 1.1          | 2.8**  | 4.5*** | 1.3    | 1.8   | -0.6      | 1.8    |     |
|                          |        | Sen's slope | 0.021       | 0.0    | 0.0       | 0.0          | 0.0    | 0.0    | 0.0    | 0.0   | 0.0       | 0.0    |     |

253

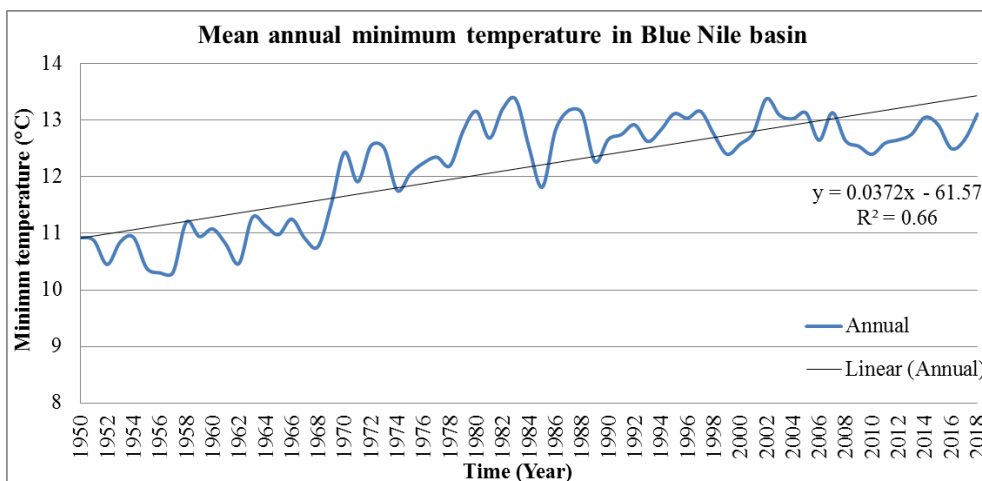

254  
255

Figure (2): Linear regression result of annual minimum temperature (1950–2018)

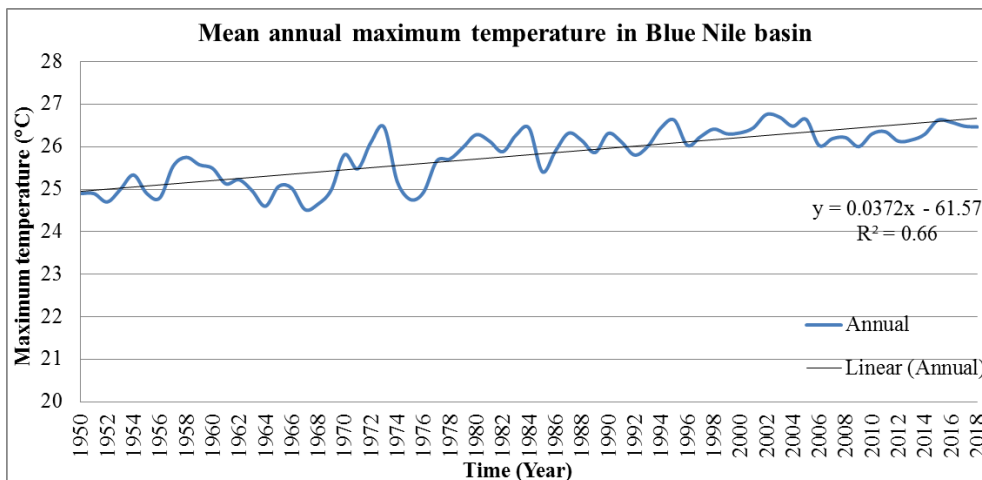

256  
257

Figure (3): Linear regression result of annual maximum temperature (1950–2018)



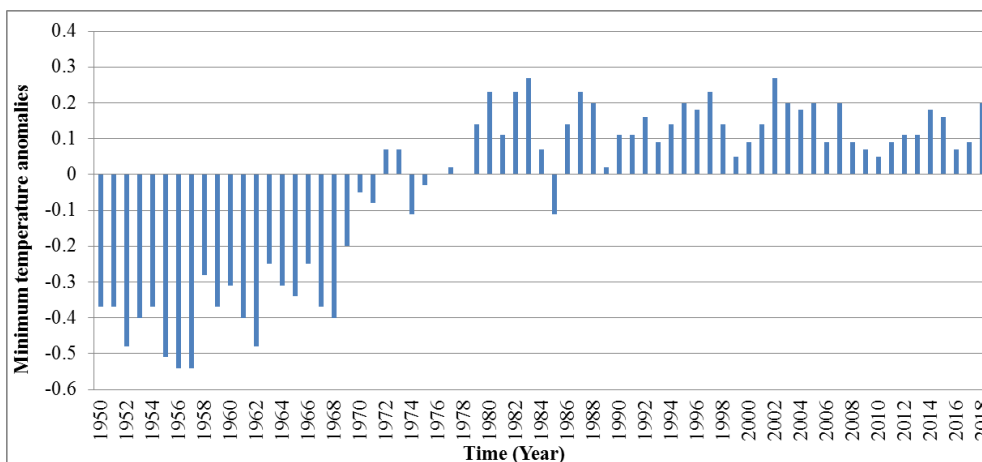

258  
259  
260

Figure (4): Minimum temperature anomalies index (RAI) of Blue Nile basin (1950–2018)

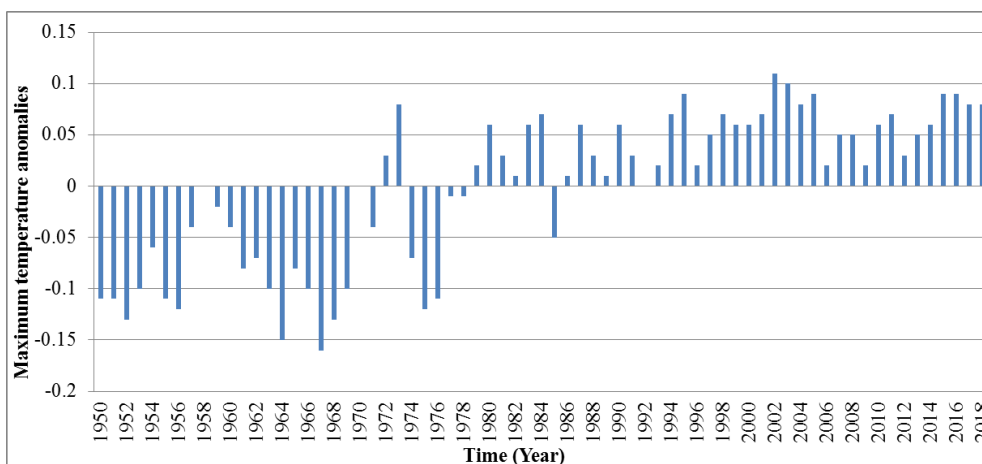

261  
262  
263  
264

Figure (5): Maximum temperature anomalies index (RAI) of the Blue Nile basin (1950–2018)

#### 4. Conclusion

265 Temporal and spatial patterns of changes in extreme temperatures are investigated in the  
266 Blue Nile River basin. The study used data from 10 meteorological stations in the basin  
267 for the period 1950-2018. The statistical data analysis used in this research work includes  
268 standard deviation, coefficient of variation, Skewness/ Kurtosis, Mann-Kendall Test, and  
269 Sens slope. The results showed that there is an increase in both maximum and minimum  
270 temperatures in the basin over the study period of 68 years. The rate of temperature



271 increase was found to be  $0.037^{\circ}$  and  $0.025^{\circ}\text{C}$  per decade for minimum and maximum  
272 temperatures, respectively. The trend of the mean minimum annual temperature for the  
273 last quarter of the 20<sup>th</sup> century was greater than the long-term average. The trend analysis  
274 test showed a significant increase of the mean minimum and maximum temperatures for  
275 all months. The rate of increase for the minimum temperature is more pronounced than  
276 the maximum. Consequently, this indicates **the** minimum temperature is more ~~likely~~  
277 sensitive to climate change. Some stations showed a decrease in the inter-annual  
278 temperature range. rational climate change may aggravate the situations of climate  
279 extremes. Therefore, appropriate adaptation and mitigation strategies should be planned  
280 to lessen the impacts of such climatic risks in the Blue Nile River Basin. A further  
281 enhancement of the current work could be attained using a long record of daily data.  
282 **More** investigation of the techniques used for trend analysis could lead to more accurate  
283 trend values. A Holistic climate change assessment over the whole Nile River Basin  
284 should get more attention and a thorough investigation. Researches on climate change  
285 detection should be done in various approaches in collaboration with worldwide  
286 concerned bodies.

## 287 **5. Data Availability Statement**

288 Some or all data, models, or code generated or used during the study are available from  
289 the corresponding author by request

## 290 **6. Author contribution**

291 All the process of the paper including but not limited to: Conceptualization, Data  
292 curation, Formal analysis, Investigation, Methodology, Project administration, Resources,  
293 Software, Supervision, Validation, Visualization, Writing – original draft preparation,



294 and Writing – review & editing were done by the Mostafa A. Mohamed and Mohamed  
295 El-Sayed El-Mahdy in equal share

## 296 7. Competing interests

297 The authors declare that they have no conflict of interest.

## 298 8. References

- 299 ANACHE, J. A., FLANAGAN, D. C., SRIVASTAVA, A. & WENDLAND, E. C. 2018. Land use and  
300 climate change impacts on runoff and soil erosion at the hillslope scale in the Brazilian  
301 Cerrado. *Science of the Total Environment*, 622, 140-151.
- 302 ASFAW, A., SIMANE, B., HASSEN, A. & BANTIDER, A. 2018. Variability and time series trend  
303 analysis of rainfall and temperature in northcentral Ethiopia: A case study in Woleka  
304 sub-basin. *Weather and climate extremes*, 19, 29-41.
- 305 BATHIANY, S., DAKOS, V., SCHEFFER, M. & LENTON, T. M. 2018. Climate models predict  
306 increasing temperature variability in poor countries. *Science advances*, 4, eaar5809.
- 307 BAYRAMZADEH, V., ZHU, H., LU, X., ATTAROD, P., ZHANG, H., LI, X., ASAD, F. & LIANG, E. 2018.  
308 Temperature variability in northern Iran during the past 700 years. *Sci. Bull*, 63, 462-464.
- 309 BERGSTRÖM, S., CARLSSON, B., GARDELIN, M., LINDSTRÖM, G., PETTERSSON, A. &  
310 RUMMUKAINEN, M. 2001. Climate change impacts on runoff in Sweden assessments by  
311 global climate models, dynamical downscaling and hydrological modelling. *Climate*  
312 *research*, 16, 101-112.
- 313 BRUNET, M., JONES, P., SIGRÓ, J., SALADIÉ, O., AGUILAR, E., MOBERG, A., DELLA-MARTA, P.,  
314 LISTER, D., WALTHER, A. & LÓPEZ, D. 2005. Spatial and temporal temperature variability  
315 and change over Spain during 1850-2003. *Journal of Geophysical Research–*  
316 *Atmospheres*.
- 317 CHEN, H., XU, C.-Y. & GUO, S. 2012. Comparison and evaluation of multiple GCMs, statistical  
318 downscaling and hydrological models in the study of climate change impacts on runoff.  
319 *Journal of hydrology*, 434, 36-45.
- 320 CONWAY, D. & SCHIPPER, E. L. F. 2011. Adaptation to climate change in Africa: Challenges and  
321 opportunities identified from Ethiopia. *Global Environmental Change*, 21, 227-237.
- 322 CRIMP, S., NICHOLLS, N., KOKIC, P., RISBEY, J. S., GOBBETT, D. & HOWDEN, M. 2018. Synoptic to  
323 large-scale drivers of minimum temperature variability in Australia–long-term changes.  
324 *International Journal of Climatology*, 38, e237-e254.
- 325 DEGEFU, M. A. & BEWKET, W. 2014. Variability and trends in rainfall amount and extreme event  
326 indices in the Omo-Ghibe River Basin, Ethiopia. *Regional environmental change*, 14, 799-  
327 810.
- 328 EL-MAHDY, M. E.-S., ABBAS, M. S. & SOBHY, H. M. 2019. Development of mass-transfer  
329 evaporation model for Lake Nasser, Egypt. *Journal of Water and Climate Change*.
- 330 EL-MAHDY, M. E. 2011. *Recent changes of Lake Nasser hydrology*. MSc. thesis, P241, Cairo  
331 University.
- 332 EL-MAHDY, M. E. Tana Lake Free Water Evaporation. Sustainable Development of Natural  
333 Resources in the Nile Basin Countries-Cairo University, Giza, Egypt, 2014. 353-389.
- 334 EL-MAHDY, M. E. 2017. *Modelling Eastern Nile Basin Hydrology*. Cairo University.



- 335 EL-MAHDY, M. E., ABBAS, M. S. & SOBHY, H. M. 2018. Investigating the Water Quality of the  
336 Water Resources Bank of Egypt: Lake Nasser. *Conventional Water Resources and*  
337 *Agriculture in Egypt*. Springer.
- 338 FEKADU, K. 2015. Ethiopian seasonal rainfall variability and prediction using canonical  
339 correlation analysis (CCA). *Earth Sciences*, 4, 112.
- 340 GEBRECHORKOS, S. H., HÜLSMANN, S. & BERNHOFER, C. 2020. Analysis of climate variability and  
341 droughts in East Africa using high-resolution climate data products. *Global and*  
342 *Planetary Change*, 186, 103130.
- 343 GEBREHIWOT, T. & VAN DER VEEN, A. 2013. Assessing the evidence of climate variability in the  
344 northern part of Ethiopia. *Journal of development and agricultural economics*, 5, 104-  
345 119.
- 346 GLEICK, P. H. 2000. *Water: the potential consequences of climate variability and change for the*  
347 *water resources of the United States*, Pacific Institute for Studies in Development,  
348 Environment, and Security.
- 349 GROSS, M. H., DONAT, M. G., ALEXANDER, L. V. & SISSON, S. A. 2018. The sensitivity of daily  
350 temperature variability and extremes to dataset choice. *Journal of Climate*, 31, 1337-  
351 1359.
- 352 GUO, Y., LI, Y., WANG, F., WEI, Y. & RONG, Z. 2020. Processes Controlling Sea Surface  
353 Temperature Variability of Ningaloo Niño. *Journal of Climate*, 33, 4369-4389.
- 354 HAILE, M. 2005. Weather patterns, food security and humanitarian response in sub-Saharan  
355 Africa. *Philosophical Transactions of the Royal Society of London B: Biological Sciences*,  
356 360, 2169-2182.
- 357 HOUGHTON, E. 1996. *Climate change 1995: The science of climate change: contribution of*  
358 *working group I to the second assessment report of the Intergovernmental Panel on*  
359 *Climate Change*, Cambridge University Press.
- 360 ISIOMA, I. N., RUDOLPH, I. I. & OMENA, A. L. 2018. Non-parametric Mann-Kendall Test Statistics  
361 for Rainfall Trend Analysis in Some Selected States within the Coastal Region of Nigeria.  
362 *Journal of Civil, Construction and Environmental Engineering*, 3, 17.
- 363 JANSSENS, C., HAVLÍK, P., KRISZTIN, T., BAKER, J., FRANK, S., HASEGAWA, T., LECLÈRE, D., OHREL,  
364 S., RAGNAUTH, S. & SCHMID, E. 2020. Global hunger and climate change adaptation  
365 through international trade. *Nature Climate Change*, 1-7.
- 366 JONES, P. 1999. Sur face Air Tem per a ture and Its Vari a tions over the Last 150 Years. *Rev.*  
367 *Geophys*, 37.
- 368 JONES, P. D. & HULME, M. 1996. Calculating regional climatic time series for temperature and  
369 precipitation: methods and illustrations. *International Journal of Climatology: A Journal*  
370 *of the Royal Meteorological Society*, 16, 361-377.
- 371 KEBEDE, S., TRAVI, Y., ALEMAYEHU, T. & MARC, V. 2006. Water balance of Lake Tana and its  
372 sensitivity to fluctuations in rainfall, Blue Nile basin, Ethiopia. *Journal of hydrology*, 316,  
373 233-247.
- 374 KIROS, G., SHETTY, A. & NANDAGIRI, L. 2016. Analysis of variability and trends in rainfall over  
375 northern Ethiopia. *Arabian Journal of Geosciences*, 9, 451.
- 376 LINDZEN, R. S. & GIANNITSIS, C. 2002. Reconciling observations of global temperature change.  
377 *Geophysical research letters*, 29, 24-1-24-3.
- 378 MANN, H. B. 1945. Nonparametric tests against trend. *Econometrica: Journal of the Econometric*  
379 *Society*, 245-259.
- 380 MANN, M. E., BRADLEY, R. S. & HUGHES, M. K. 1999. Northern hemisphere temperatures during  
381 the past millennium: Inferences, uncertainties, and limitations. *Geophysical research*  
382 *letters*, 26, 759-762.



- 383 MARGARET, F. 2003. Planning for the Next Drought, Ethiopia Case Study. *USAID, Washington*.
- 384 MCLEOD, A. I. 2005. Kendall rank correlation and Mann-Kendall trend test. *R Package Kendall*.
- 385 MENGISTU, D., BEWKET, W. & LAL, R. 2014. Recent spatiotemporal temperature and rainfall  
386 variability and trends over the Upper Blue Nile River Basin, Ethiopia. *International*  
387 *Journal of Climatology*, 34, 2278-2292.
- 388 NIJSSE, F. J., COX, P. M., HUNTINGFORD, C. & WILLIAMSON, M. S. 2019. Decadal global  
389 temperature variability increases strongly with climate sensitivity. *Nature Climate*  
390 *Change*, 9, 598-601.
- 391 PACHAURI, R. K. & MEYER, L. 2014. Climate change 2014 Synthesis Report-Summary for  
392 Policymakers. Intergovernmental Panel on Climate Change (IPCC).
- 393 PETTITT, A. 1979. A non-parametric approach to the change-point problem. *Journal of the Royal*  
394 *Statistical Society: Series C (Applied Statistics)*, 28, 126-135.
- 395 ROY, T. D. & DAS, K. K. 2013. Temperature Trends at Four Stations of Assam during the period  
396 1981-2010. *Int. J. Sci. Res. Publ*, 3, 1-3.
- 397 SALAWITCH, R. J. 1998. A greenhouse warming connection. *Nature*, 392, 551-552.
- 398 SCOTT, A. A., ZAITCHIK, B., WAUGH, D. W. & O'MEARA, K. 2017. Intraurban temperature  
399 variability in Baltimore. *Journal of Applied Meteorology and Climatology*, 56, 159-171.
- 400 SELESHI, Y. & CAMBERLIN, P. 2006. Recent changes in dry spell and extreme rainfall events in  
401 Ethiopia. *Theoretical and Applied Climatology*, 83, 181-191.
- 402 SEN, P. K. 1968. Estimates of the regression coefficient based on Kendall's tau. *Journal of the*  
403 *American statistical association*, 63, 1379-1389.
- 404 SHANKO, D. & CAMBERLIN, P. 1998. The effects of the Southwest Indian Ocean tropical cyclones  
405 on Ethiopian drought. *International Journal of Climatology*, 18, 1373-1388.
- 406 SINTAYEHU, L. 2015. Application of the HEC-HMS model for runoff simulation of upper blue Nile  
407 River Basin. *Hydrol Current Res*, 6, 1-8.
- 408 SIPPEL, S., MEINSHAUSEN, N., FISCHER, E. M., SZÉKELY, E. & KNUTTI, R. 2020. Climate change  
409 now detectable from any single day of weather at global scale. *Nature Climate Change*,  
410 10, 35-41.
- 411 TABARI, H., TAYE, M. T. & WILLEMS, P. 2015. Statistical assessment of precipitation trends in the  
412 upper Blue Nile River basin. *Stochastic environmental research and risk assessment*, 29,  
413 1751-1761.
- 414 TABARI, M. M. R. & TAVAKOLI, S. 2016. Effects of stepped spillway geometry on flow pattern  
415 and energy dissipation. *Arabian Journal for Science and Engineering*, 41, 1215-1224.
- 416 TAMIRU, M. 2011. *Evaluation of Extreme Rainfall and Temperature Variability (In Upper Blue*  
417 *Nile, Ethiopia)*. Addis Ababa University.
- 418 TAPLEY, B. D., WATKINS, M. M., FLECHTNER, F., REIGBER, C., BETTADPUR, S., RODELL, M.,  
419 SASGEN, I., FAMIGLIETTI, J. S., LANDERER, F. W. & CHAMBERS, D. P. 2019. Contributions  
420 of GRACE to understanding climate change. *Nature climate change*, 9, 358-369.
- 421 TURNER, J., MARSHALL, G. J., CLEM, K., COLWELL, S., PHILLIPS, T. & LU, H. 2020. Antarctic  
422 temperature variability and change from station data. *International Journal of*  
423 *Climatology*, 40, 2986-3007.
- 424 WATSON, R. T., ZINYOWERA, M. C. & MOSS, R. H. 1996. *Climate change 1995. Impacts,*  
425 *adaptations and mitigation of climate change: Scientific-technical analyses*.
- 426 YAN, Y., XUE, B., YINGLAN, A., SUN, W. & ZHANG, H. 2020. Quantification of climate change and  
427 land cover/use transition impacts on runoff variations in the upper Hailar Basin, NE  
428 China. *Hydrology Research*.



429 YUE, S., PILON, P. & CAVADIAS, G. 2002. Power of the Mann–Kendall and Spearman's rho tests  
430 for detecting monotonic trends in hydrological series. *Journal of hydrology*, 259, 254-  
431 271.

432
